# Supplementary material
Source: PubMed Central journal article supplement (PMC5355904)
Supplement: cn6b00234_si_001.pdf [file cn6b00234_si_001.pdf]

| avGFP | super ecliptic pHluorin GFP | GEVI ArcLight | GEVI Marina |
|-------|-----------------------------|---------------|-------------|
| S65   | T65                         | T307          | T307        |
| R96   | R96                         | R338          | R338        |
| S147  | D147                        | D389          | A389        |
| H148  | H148                        | H390          | A390        |
| N149  | Q149                        | Q391          | Q391        |
| Y151  | Y151                        | Y393          | Y393        |
| R168  | R168                        | R410          | R410        |
| Y200  | Y200                        | Y442          | A442        |
| S202  | F202                        | F444          | F444        |
| T203  | T203                        | T445          | T445        |
| Q204  | T204                        | T446          | T446        |
| S205  | S205                        | S447          | S447        |
| A206  | T206                        | T448          | T448        |
| L221  | L221                        | L463          | L463        |
| E222  | E222                        | E464          | E464        |
| F223  | F223                        | F465          | F465        |
| A227  | A227                        | D469          | D469        |

**Figure S1:** The list of amino acid residues in fluorescent protein that were targeted for creating mutagenic libraries described in the paper. The shown numbering of amino acid residues is from starting Methionine in avGFP, super ecliptic pHluorin GFP, GEVI ArcLight and GEVI Marina.

|                                   | % $\Delta F/F$ | t <sub>on1</sub> (ms) | t <sub>on2</sub> (ms) | % fast t <sub>On</sub> | t <sub>off1</sub> (ms) | t <sub>off2</sub> (ms) | % fast t <sub>Off</sub> |
|-----------------------------------|----------------|-----------------------|-----------------------|------------------------|------------------------|------------------------|-------------------------|
| ArcLight                          | -39.5±1.2      | 12.3±1.8              | 34.7±3.14             | 38±6                   | 14.1±0.4               | x                      | x                       |
| ArcLight A389 A390                | 17.8±1.2       | 3.6±0.6               | 30.3±3.0              | 37±2                   | 12.1±0.6               | 46.8±5.6               | 68± 7                   |
| ArcLight A389 A390 V442<br>Marina | 29.2±2.0       | 28.8±2.4              | x                     | x                      | 15.6±1.5               | 59.4±5.8               | 61± 4                   |

**Figure S2.** Size and speed of voltage dependent response of GEVI Marina. Novel GEVI Marina is showing similar kinetic properties as parent ArcLight. Comparison of %  $\Delta F/F$ , activation and deactivation kinetics of parent probe ArcLight (n=4 cells) and two mutants with reversed voltage-dependent response, ArcLight A389 A390 (n= 6 cells) and ArcLight A389 A390 V442 (n=12 cells). Data are plotted as mean  $\pm$  s.e.m.

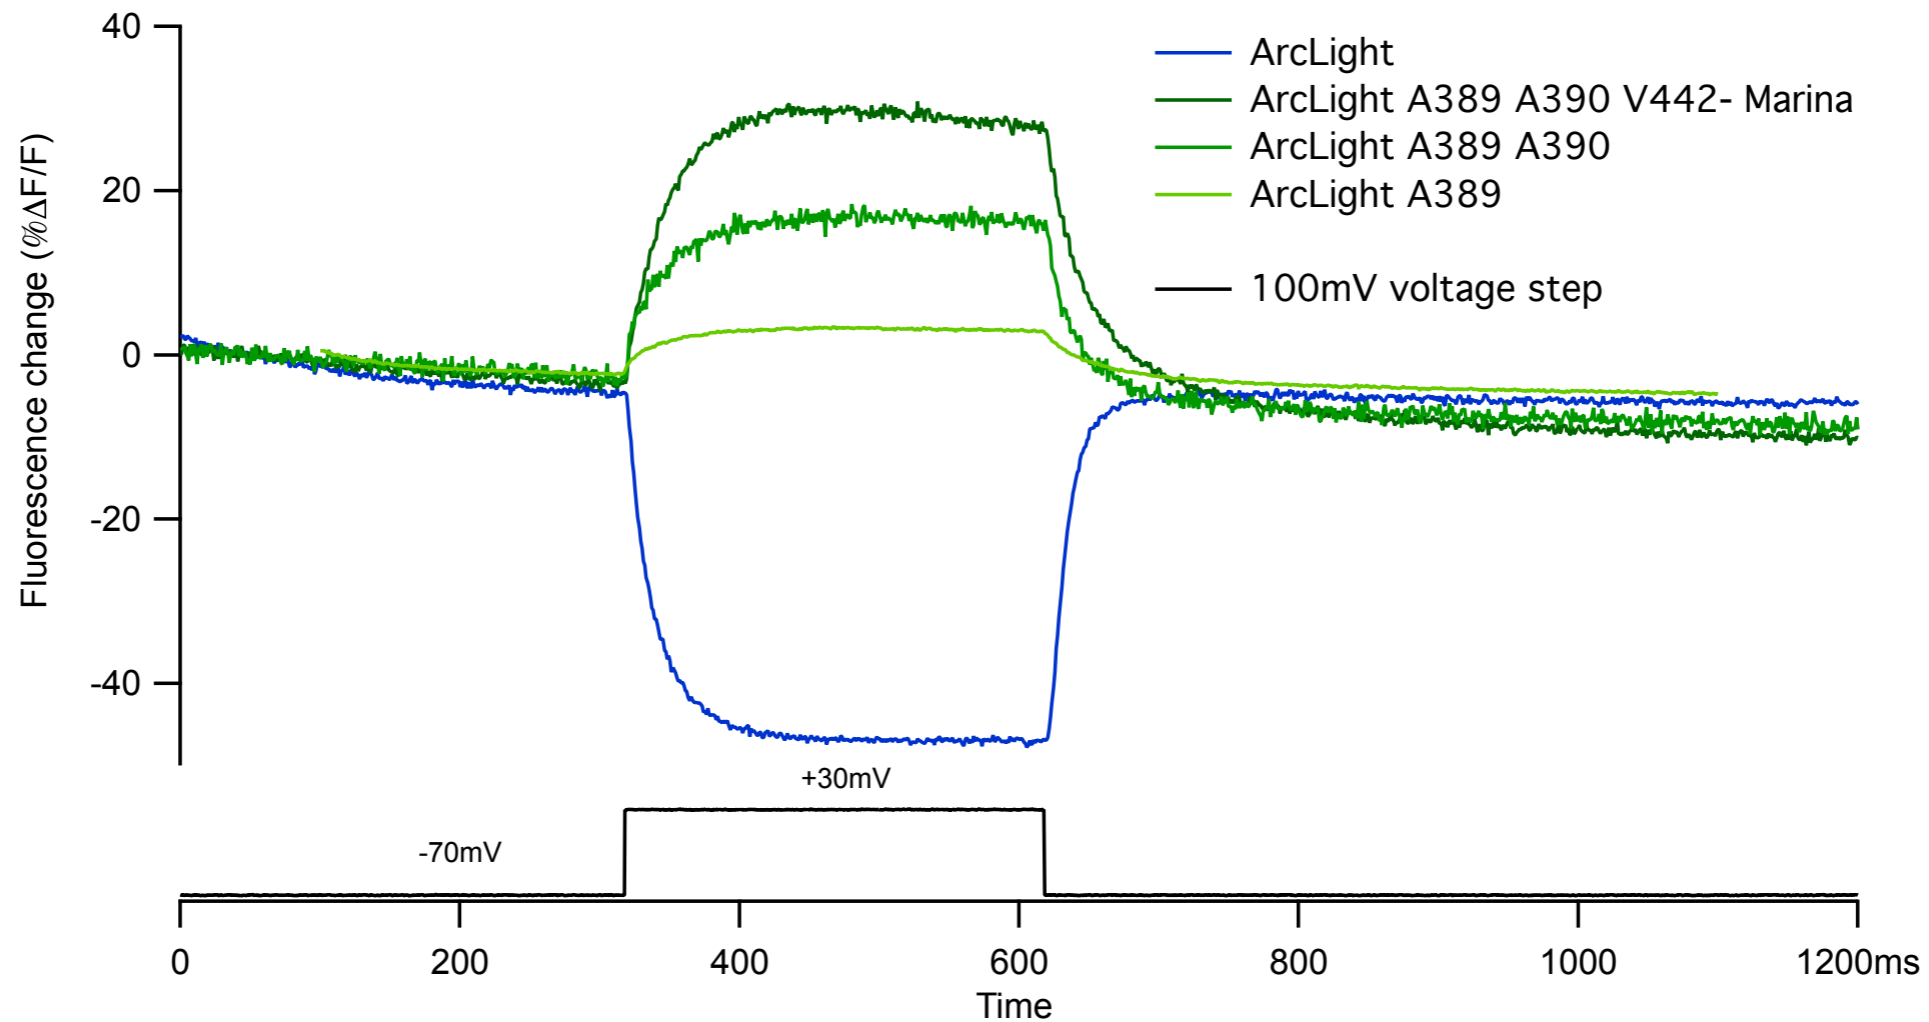

**Figure S3.** Same traces as in Figure 3. are shown here without bleach correction. HEK293 cells transiently expressing various GEVIs were simultaneously electrically recorded using whole-cell patch clamp (300ms/100mV depolarizing steps from -70 mV holding potential) and imaged with a high-speed (1000 Hz) CCD camera. Depolarization changes in membrane potential cause decrease in fluorescence intensity in ArcLight (in blue) and increase in fluorescence intensity in ArcLight D389A (light green), ArcLight A389 H390A (green) and ArcLight A389 A390 Y442V-Marina (dark green). All traces are unfiltered single trials. Excitation light intensity measured at the sample plane was 18 mW/mm<sup>2</sup>.

| GEVI name                                    | FP                      | FP insertion site within <i>CiVSD</i> | AA residue at 65 in eGFP (in GEVI) | $\Delta F$ orientation (at 400nm) | $\Delta F$ orientation (at 488nm) | Addgene # |
|----------------------------------------------|-------------------------|---------------------------------------|------------------------------------|-----------------------------------|-----------------------------------|-----------|
| <b>epArcLight</b>                            | Ecliptic pHluorin       | S249                                  | S65 (S317)                         | +                                 | -                                 | 85803     |
| <b>ArcLight (S249)</b>                       | Super Ecliptic phluorin | S249                                  | T65 (T317)                         | no signal                         | -                                 | 36855     |
| <b>ArcLightCo (Q239)</b>                     | Super Ecliptic phluorin | Q239                                  | T65 (T307)                         | no signal                         | -                                 | 85844     |
| <b>ArcLight A389 A390</b>                    | Super Ecliptic phluorin | Q239                                  | T65 (T307)                         | no signal                         | +                                 | n/a       |
| <b>ArcLight S307 A389 A390</b>               | Super Ecliptic phluorin | Q239                                  | S65 (S307)                         | no signal                         | +                                 | n/a       |
| <b>ArcLight T307 A389 A390 V442 (Marina)</b> | Super Ecliptic phluorin | Q239                                  | T65 (T307)                         | no signal                         | +                                 | 74216     |

**Figure S4.** The list of GEVIs used in the experiments with results shown in Figure 7.
